# Supplementary material for: Laparoscopic Right Hemihepatectomy after Future Liver Remnant Modulation: A Single Surgeon’s Experience
Source: MDPI journal article supplement (doi:10.3390/cancers15102851), 2023-05-21
Supplement: s1 [file s1]

**Supplementary Table S1. Univariable and Multivariable Regression Analyses**

|                        | TOLS                   |              |                       |       | Pringle Duration                |              |               |   | Operative Time                    |              |                                   |       |
|------------------------|------------------------|--------------|-----------------------|-------|---------------------------------|--------------|---------------|---|-----------------------------------|--------------|-----------------------------------|-------|
|                        | Univariable            |              | Multivariable         |       | Univariable                     |              | Multivariable |   | Univariable                       |              | Multivariable                     |       |
| Term                   | OR (95% CI)            | P            | aOR (95% CI)          | P     | OR (95% CI)                     | P            | aOR (95% CI)  | P | OR (95% CI)                       | P            | aOR (95% CI)                      | P     |
| BMI                    | 0.916 (0.681 - 1.179)  | 0.516        | -                     | -     | 2.183 (0.688 - 6.928)           | 0.177        | -             | - | 0.382 (2.114e-4 - 6.896e+2)       | 0.795        | -                                 | -     |
| Cirrhosis              | 1.467 (0.190 - 30.363) | 0.747        | -                     | -     | 101.291 (2.880e-04 - 3.562e+07) | 0.470        | -             | - | 3.884e+36 (1.462e-03 - 1.034e+76) | <b>0.068</b> | 2.872e+29 (0.001 - 1.034e+76)     | 0.197 |
| Previous Liver Surgery | 0.264 (0.065 - 1.004)  | <b>0.053</b> | 0.134 (0.065 - 1.004) | 0.117 | 32.427 (6.340e-03 - 1.657e+05)  | 0.416        | -             | - | 4.027e+22 (1.273e-2 - 1.274e+47)  | <b>0.070</b> | 1.705e+18 (0.013 - 1.274e+47)     | 0.250 |
| Size largest lesion    | 0.991 (0.976 - 1.006)  | <b>0.098</b> | 0.986 (0.976 - 1.006) | 0.147 | 1.002 (0.909 - 1.105)           | 0.961        | -             | - | 1.647 (0.926 - 2.927)             | <b>0.088</b> | 1.468 (0.926 - 2.927)             | 0.192 |
| No of Lesions          | 0.735 (0.499 - 1.057)  | <b>0.099</b> | 0.707 (0.499 - 1.057) | 0.186 | 1.098 (0.067 - 17.997)          | 0.947        | -             | - | 21057.25 (0.003 - 1.329e+11)      | 0.207        | -                                 | -     |
| FLRM                   | 1.198 (0.305 - 4.436)  | 0.788        | 5.076 (0.305 - 4.436) | 0.183 | 34440.9 (8.944 - 1.327e+08)     | <b>0.014</b> | -             | - | 3.706e+31 (4.476e+10 - 3.052e+52) | <b>0.003</b> | 2.952e+18 (4.476e+10 - 3.052e+52) | 0.222 |
